# Supplementary material
Source: HighWire-hosted journal article supplement (https://bmjopen.bmj.com/content/10/8/e038247)
Supplement: inline-supplementary-material-1 [file inline-supplementary-material-1.pdf]

**SUPPLEMENTARY MATERIAL****Second-generation antipsychotics and the Risk of Chronic Kidney Disease: A Population-based Case-Control Study**

Højlund M, Lund LC, Herping JLE, Haastrup MB, Damkier P, Henriksen DP  
2020

## Contents

|                                                                                                                 |   |
|-----------------------------------------------------------------------------------------------------------------|---|
| Appendix 1: Definitions for exposures, outcomes and confounders .....                                           | 2 |
| Appendix 2: Supplementary analysis of association between risk factors, negative control exposure and CKD ..... | 3 |
| Appendix 3: Association between CKD and cumulated dose of SGA modeled using restricted cubic splines .....      | 4 |
| Appendix 4: Sensitivity analysis with modified eligibility criteria for controls .....                          | 5 |
| References .....                                                                                                | 6 |

**Appendix 1: Definitions for exposures, outcomes and confounders**

| <b>Study drugs</b>                             | ATC code                                                                                        | DDD<br>(mg) | Equivalent to 1mg<br>olanzapine (mg) | Risk of metabolic<br>disturbances (1) |
|------------------------------------------------|-------------------------------------------------------------------------------------------------|-------------|--------------------------------------|---------------------------------------|
| (Second-generation antipsychotics)             |                                                                                                 |             |                                      |                                       |
| Aripiprazole                                   | N05AX12                                                                                         | 15          | 1.5                                  | Low                                   |
| Clozapine                                      | N05AH02                                                                                         | 300         | 30                                   | High                                  |
| Olanzapine                                     | N05AH03                                                                                         | 10          | -                                    | High                                  |
| Risperidone                                    | N05AX08                                                                                         | 5           | 0.5                                  | Mild                                  |
| Quetiapine                                     | N05AH04                                                                                         | 400         | 40                                   | Moderate                              |
| <b>Other medications</b>                       |                                                                                                 |             |                                      |                                       |
| Non-steroidal anti-inflammatory drugs (NSAIDs) | M01A, excl. M01AX01                                                                             |             |                                      |                                       |
| Lithium                                        | N05AN01                                                                                         |             |                                      |                                       |
| <b>Comorbidities</b>                           |                                                                                                 |             |                                      |                                       |
|                                                | <b>Definition</b>                                                                               |             |                                      |                                       |
| Diabetes                                       | Use of ATC-group A10                                                                            |             |                                      |                                       |
| Hypertension                                   | Use of ATC-group C03A, C08C, C09A, C09C                                                         |             |                                      |                                       |
| Possible CKD (2)                               | ICD-10: N00, 01, 03-06, 08.8, 14.1, 14.2, 16.8, 17-19, 25.1, 26-27                              |             |                                      |                                       |
| Schizophrenia                                  | ICD-10: F20                                                                                     |             |                                      |                                       |
| Bipolar affective disorder                     | ICD-10: F30-31                                                                                  |             |                                      |                                       |
| Dementia                                       | ICD-10: F00-03 and G30-31                                                                       |             |                                      |                                       |
| Prior AKI                                      | Defined using creatinine measurements according to Kidney Disease Improving Global Outcomes (3) |             |                                      |                                       |

**Appendix 2: Supplementary analysis of association between risk factors, negative control exposure and CKD**

|                                   | Crude OR (95% CI) | Adjusted OR (95% CI) |
|-----------------------------------|-------------------|----------------------|
| <b>Positive control exposures</b> |                   |                      |
| History of diabetes               | 1.59 (1.52-1.67)  | 1.45 (1.38-1.52)     |
| History of hypertension           | 1.56 (1.51-1.61)  | 1.50 (1.45-1.55)     |
| Prior use of lithium              | 1.50 (1.28-1.76)  | 1.60 (1.36-1.87)     |
| Recent use of NSAID               | 1.16 (1.12-1.20)  | 1.14 (1.10-1.18)     |
| <b>Negative control exposure</b>  |                   |                      |
| Use of ocular topical antibiotics | 0.95 (0.90-1.00)  | 0.93 (0.88-0.98)     |

**Appendix 3: Association between CKD and cumulated dose of SGA modeled using restricted cubic splines**

10%-percentile: 5 mg OLA eq, 50%-percentile: 250mg OLA eq, 90%-percentile: 11,200 mg OLA eq. Percentiles were derived from cumulative doses among cases. CI: Confidence interval, OLA eq: Olanzapine equivalents, OR: Odds ratio.

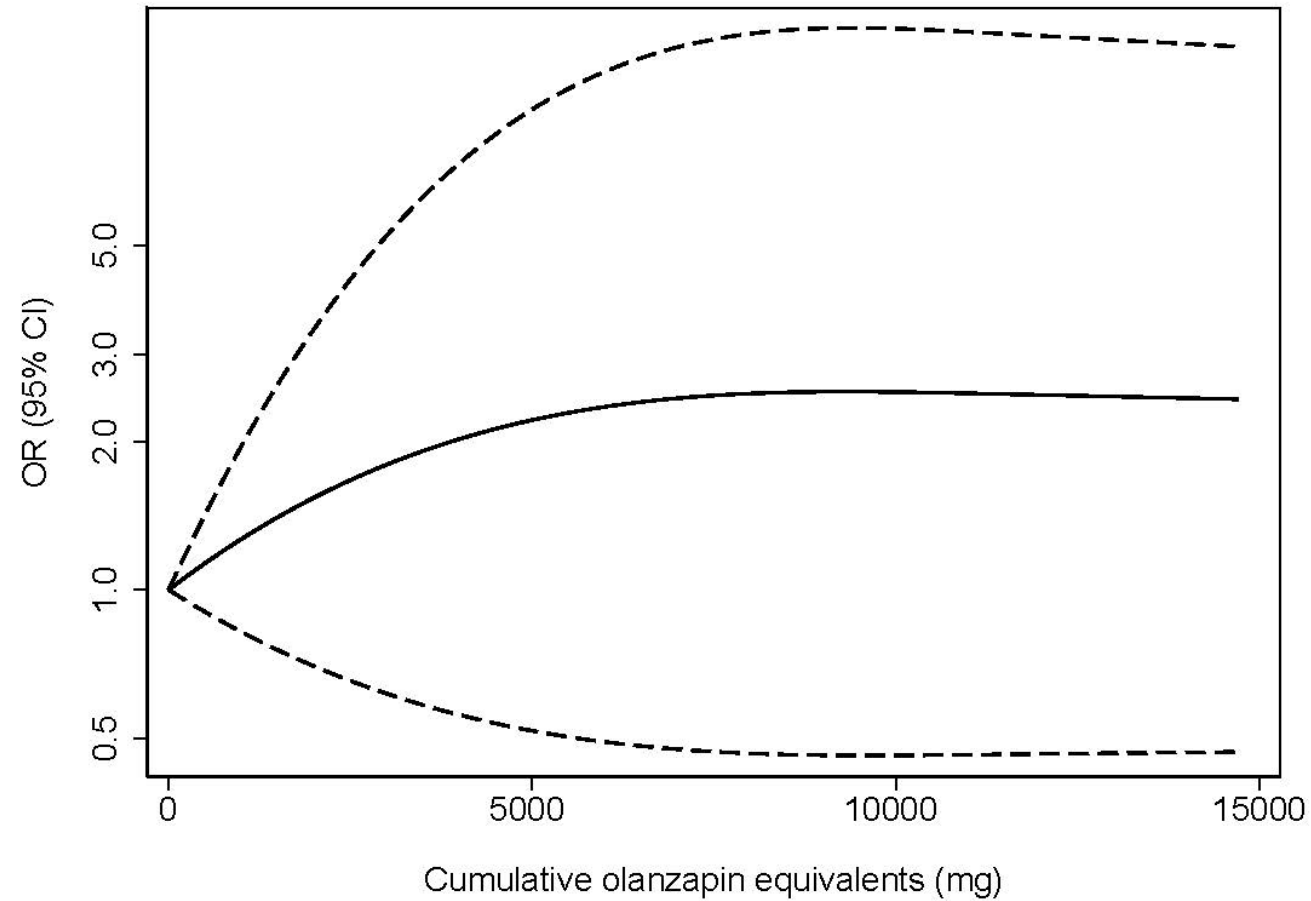

**Appendix 4: Sensitivity analysis with modified eligibility criteria for controls**

|                         | Cases<br>(N=21434) | Controls<br>(N=85654) | Crude OR (95% CI) | Adjusted OR (95% CI) |
|-------------------------|--------------------|-----------------------|-------------------|----------------------|
| Ever use                | 557                | 1654                  | 1.36 (1.23-1.49)  | 1.27 (1.14-1.40)     |
| Current use             | 399                | 1153                  | 1.39 (1.24-1.56)  | 1.32 (1.17-1.49)     |
| Cumulative use          |                    |                       |                   |                      |
| 0-899mg                 | 380                | 1223                  | 1.25 (1.12-1.41)  | 1.17 (1.03-1.32)     |
| 900-1799mg              | 52                 | 121                   | 1.71 (1.23-2.36)  | 1.58 (1.13-2.21)     |
| 1800-3649mg             | 29                 | 100                   | 1.18 (0.78-1.78)  | 1.19 (0.78-1.83)     |
| >3650mg                 | 96                 | 210                   | 1.83 (1.44-2.34)  | 1.61 (1.25-2.08)     |
| Number of prescriptions |                    |                       |                   |                      |
| 1-2                     | 144                | 384                   | 1.50 (1.24-1.82)  | 1.38 (1.13-1.69)     |
| 3-4                     | 76                 | 229                   | 1.31 (1.01-1.70)  | 1.21 (0.93-1.59)     |
| 5-10                    | 68                 | 228                   | 1.19 (0.91-1.56)  | 1.09 (0.83-1.45)     |
| 11-30                   | 115                | 444                   | 1.05 (0.85-1.29)  | 0.99 (0.80-1.22)     |
| >30                     | 154                | 369                   | 1.69 (1.40-2.05)  | 1.55 (1.27-1.88)     |

**References**

1. De Hert M, Detraux J, van Winkel R, Yu W, Correll CU. Metabolic and cardiovascular adverse effects associated with antipsychotic drugs. *Nat Rev Endocrinol*. 2011;8:114–26.
2. Kessing LV, Gerds TA, Feldt-Rasmussen B, Andersen PK, Licht RW. Use of Lithium and Anticonvulsants and the Rate of Chronic Kidney Disease: A Nationwide Population-Based Study. *JAMA Psychiatry*. 2015;72:1182–91.
3. KDIGO 2012 Clinical Practice Guideline for the Evaluation and Management of Chronic Kidney Disease. *KDIGO 2012 Clin Pract Guidel Eval Manag Chronic Kidney Dis*. 2013;3:1–150.
